# Supplementary material for: Multifunctional NaYF4:Yb/Er/Gd nanocrystal decorated SiO2 nanotubes for anti-cancer drug delivery and dual modal imaging
Source: Royal Society of Chemistry journal article supplement (doi:10.1039/c3ra40992a), 2013-01-01
Supplement: c3ra40992a.pdf [file c3ra40992a.pdf]

## Supporting Information

### **Multifunctional NaYF<sub>4</sub>:Yb/Er/Gd Nanocrystal Decorated SiO<sub>2</sub> Nanotubes for Anti-cancer Drug Delivery and Dual Modal Imaging**

**Xuejiao Li,<sup>ab</sup> Zhiyao Hou,<sup>\*a</sup> Ping'an Ma,<sup>a</sup> Xiao Zhang,<sup>a</sup> Chunxia Li,<sup>a</sup> Ziyong Cheng,<sup>a</sup> Yunlu Dai,<sup>a</sup> Jianshe Lian,<sup>b</sup> Jun Lin,<sup>\*a</sup>**

<sup>a</sup>State Key Laboratory of Rare Earth Resources Utilization, Changchun Institute of Applied Chemistry, Chinese Academy of Sciences, Changchun 130022, P. R. China

<sup>b</sup>Key Lab of Automobile Materials, Ministry of Education, College of Materials Science and Engineering, Jilin University, Changchun 130025, P. R. China.

Corresponding author. E-mail: [jlin@ciac.jl.cn](mailto:jlin@ciac.jl.cn) (Prof. Jun Lin) and [zyhou@ciac.jl.cn](mailto:zyhou@ciac.jl.cn) (Dr. Zhiyao Hou)

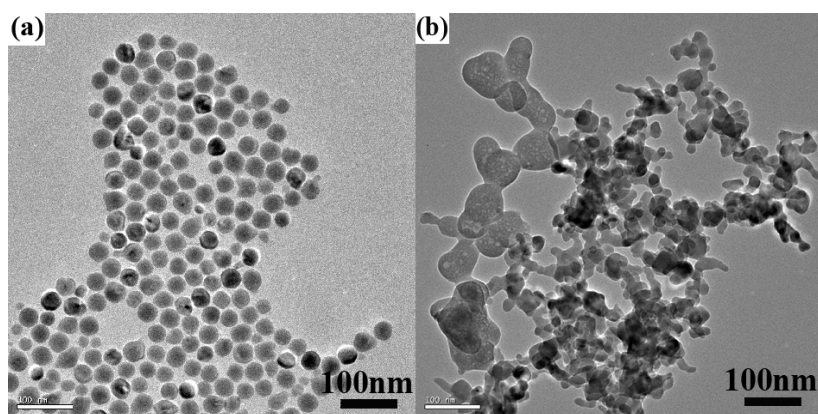

**Figure S1** TEM images of PEI coated  $\alpha$ -NaYF<sub>4</sub>:Yb/Er/Gd NCs (a) and NCs synthesis without PEI (b).

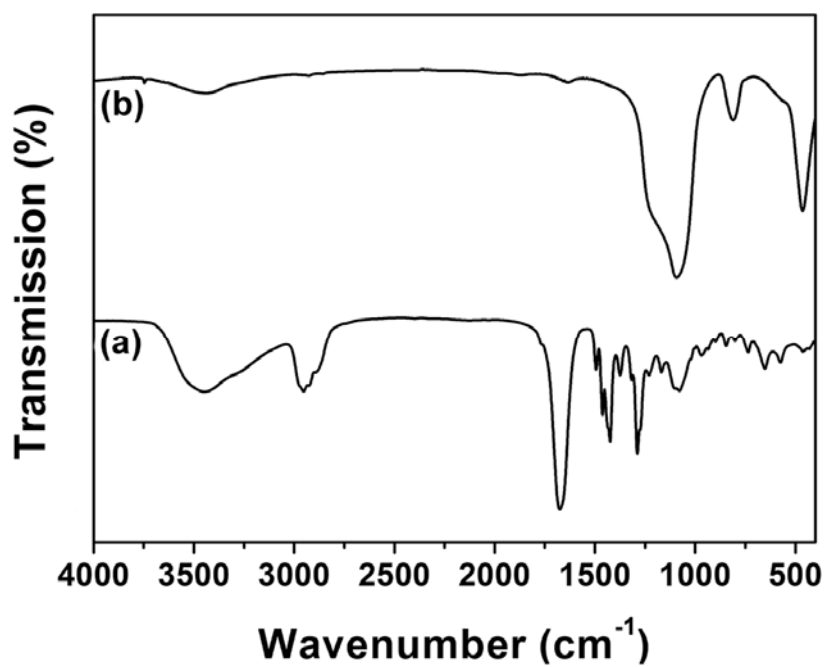

**Figure S2** The FT-IR spectra of MUCNCs@precursor fibers (a) and pure MUCNCs@SNTs (b).

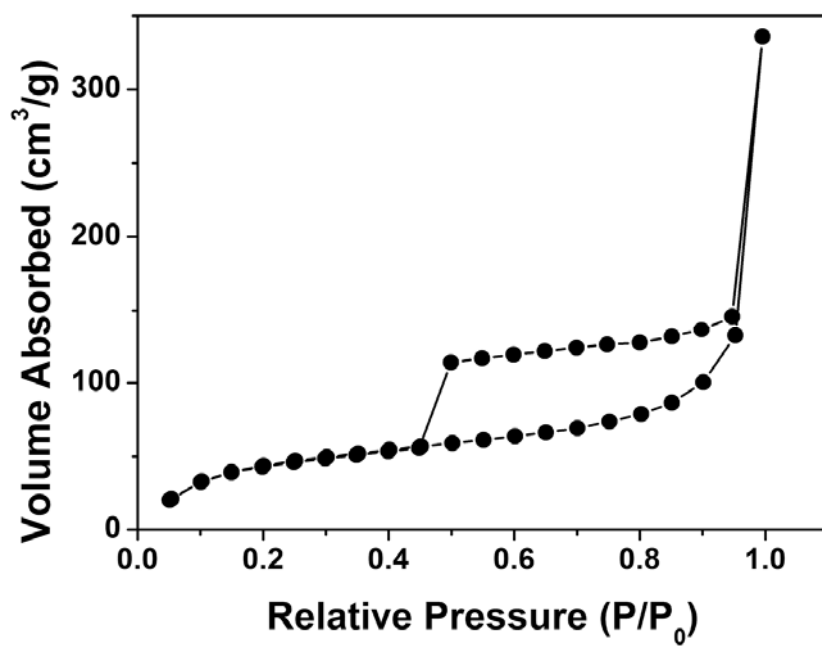

Figure S3  $\text{N}_2$  adsorption/desorption isotherms of MUCNCs@SNTs.

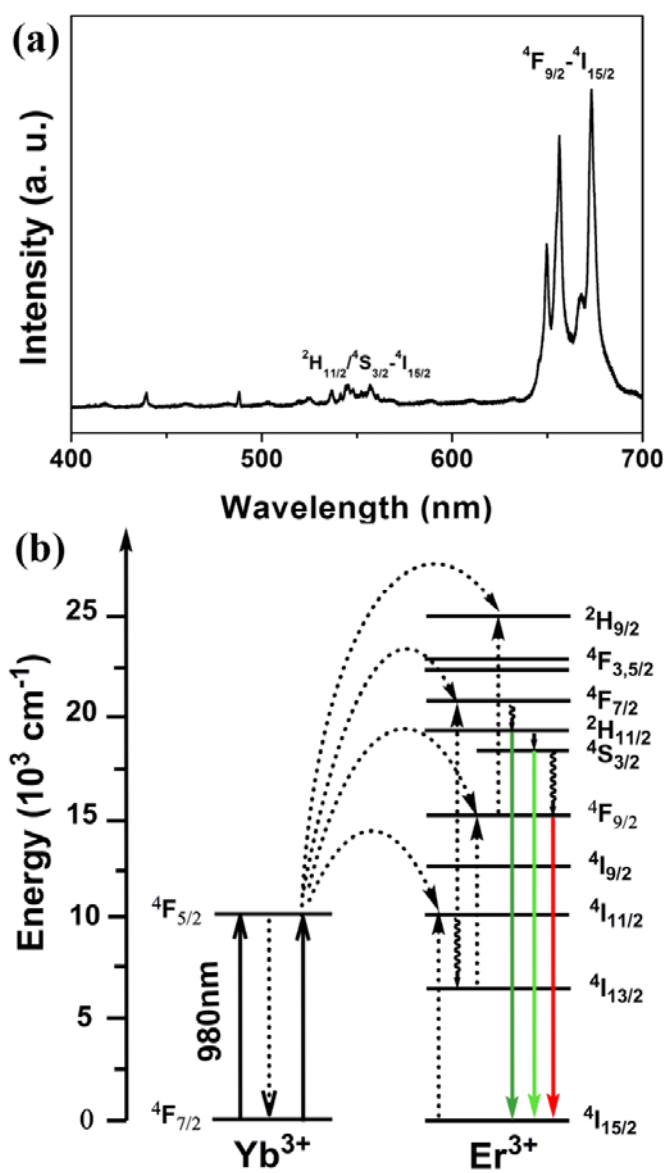

Figure S4 UC emission spectrum and UC mechanisms of the as-prepared MUCNCs@SNTs.

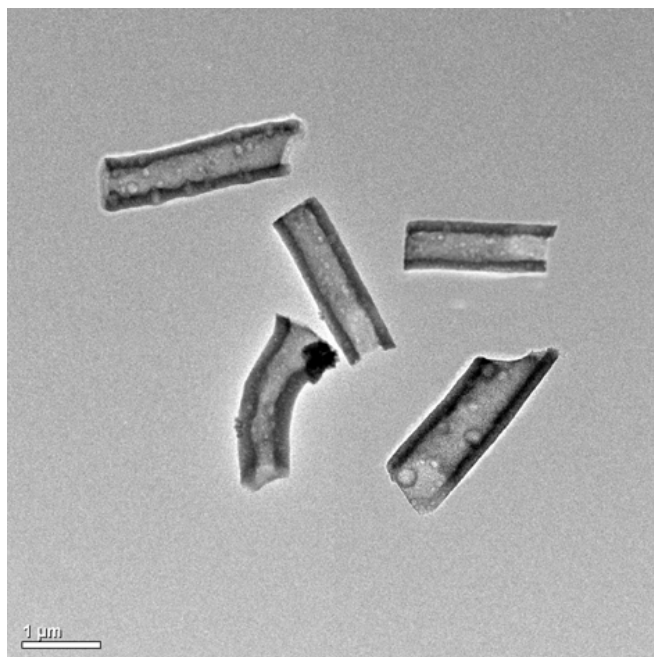

**Figure S5** TEM image of MUCNCs@SNTs fragments.
